# Supplementary material
Source: Springer Nature journal article supplement (https://www.springermedizin.de/resource/supplementary/12967_2012_1199_MOESM2_ESM.pdf/9573306)

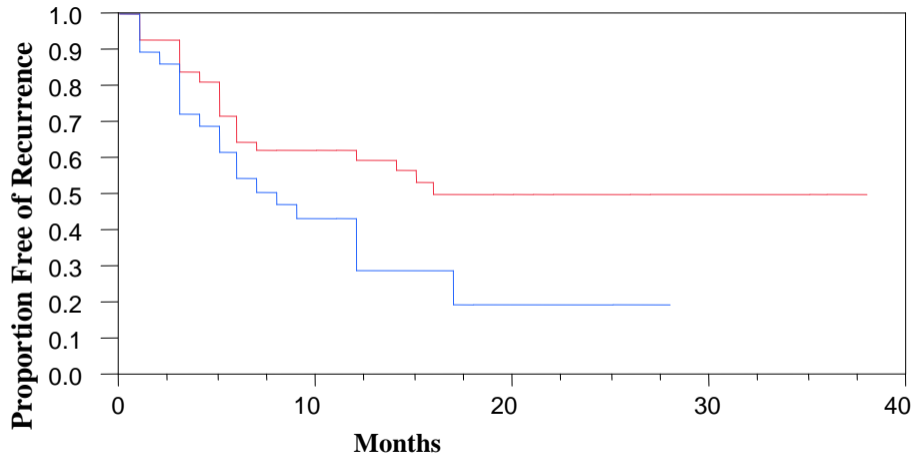

Best  
Non Best

Supplement: MOESM2 [file 9573306]
